# Supplementary material for: Recent Advances in the Genetic of MALT Lymphomas
Source: MDPI journal article supplement (doi:10.3390/cancers14010176), 2021-12-30
Supplement: s1 [file s1]

**Supplemental Table S1. Recurrently mutated genes in MALT lymphomas.** Review of references with more than 10 patients and testing more than 5 genes. Include series with MALT lymphoma at different sites and also series with specific locations.

|                                  | Bi,<br>2012<br>Yan,<br>2013 | Johansson,<br>2016 | Gonapathi,<br>2016 | Cani,<br>2016 | Jung,<br>2017 | Moody,<br>2017 | Moody, 2018                      | Hyeon,<br>2018        | Cascione,<br>2019 | Johanson,<br>2020 | Vela,<br>2020 | Wu, 2021 | Kissewetter,<br>2021    |
|----------------------------------|-----------------------------|--------------------|--------------------|---------------|---------------|----------------|----------------------------------|-----------------------|-------------------|-------------------|---------------|----------|-------------------------|
| <b>N</b>                         | 105                         | 63                 | 14                 | 21            | 10            | 179            | 115/58/13/36                     | 19                    | 72                | 13+82             | 34            | 76       | 35                      |
| <b>Sites</b>                     | OAMZL                       | OAMZL              | Dura               | OAMZL         | OAMZL         | All            | OAMZL/ SGMZL/<br>Thyroid/Stomach | Stomach,<br>resistant | All               | OAMZL             | OAMZL         | Thyroid  | Stomach, HP<br>negative |
| <b>Cell cycle</b>                |                             |                    |                    |               |               |                |                                  |                       |                   |                   |               |          |                         |
| <b>BTG1</b>                      |                             |                    |                    |               |               |                |                                  |                       |                   |                   | 6             |          |                         |
| <b>DNA-damage</b>                |                             |                    |                    |               |               |                |                                  |                       |                   |                   |               |          |                         |
| <b>NSH3</b>                      |                             |                    |                    |               |               |                |                                  | 11                    |                   |                   |               |          |                         |
| <b>NLH1</b>                      |                             |                    |                    |               |               |                |                                  | 11                    |                   |                   |               |          |                         |
| <b>BRCA1</b>                     |                             |                    |                    |               |               |                |                                  | 11                    |                   |                   |               |          |                         |
| <b>BRCA2</b>                     |                             |                    |                    |               |               |                |                                  | 11                    |                   |                   |               |          |                         |
| <b>BRIP1</b>                     |                             |                    |                    |               |               |                |                                  | 11                    |                   |                   |               |          |                         |
| <b>TP53</b>                      |                             |                    |                    |               |               |                |                                  | 5                     |                   |                   | 6             |          | 6                       |
| <b>RB1</b>                       |                             |                    |                    |               |               |                |                                  | 5                     |                   |                   |               |          |                         |
| <b>ATM</b>                       |                             |                    |                    |               |               |                |                                  |                       |                   |                   |               |          | 6                       |
| <b>NOTCH</b>                     |                             |                    |                    |               |               |                |                                  |                       |                   |                   |               |          |                         |
| <b>NOTCH1</b>                    |                             | 8                  |                    |               | 6             |                | 2/5/0/11                         | 16                    | 11*               |                   |               |          | 11                      |
| <b>NOTCH2</b>                    |                             | 8                  | 29                 |               |               |                |                                  |                       | 11*               |                   |               |          | 6                       |
| <b>SPEN</b>                      |                             |                    |                    |               |               |                |                                  |                       | 17                |                   |               |          |                         |
| <b>RAS/MAPK/ERK</b>              |                             |                    |                    |               |               |                |                                  |                       |                   |                   |               |          |                         |
| <b>MAP3K7</b>                    |                             |                    |                    |               |               |                |                                  | 5                     |                   |                   |               |          |                         |
| <b>MAP3K14</b>                   |                             |                    |                    |               |               |                |                                  |                       |                   |                   |               |          | 9                       |
| <b>NF1</b>                       |                             |                    |                    |               |               |                |                                  | 16                    |                   |                   |               |          |                         |
| <b>Immune escape</b>             |                             |                    |                    |               |               |                |                                  |                       |                   |                   |               |          |                         |
| <b>B2MG</b>                      |                             |                    |                    |               |               |                |                                  |                       | 10                |                   |               |          |                         |
| <b>PDL1 (CD271)</b>              |                             |                    |                    |               |               |                |                                  |                       |                   |                   |               | 52.6     |                         |
| <b>Transcription<br/>factors</b> |                             |                    |                    |               |               |                |                                  |                       |                   |                   |               |          |                         |
| <b>POU2F2</b>                    |                             |                    |                    |               |               |                |                                  | 5                     |                   |                   |               |          |                         |
| <b>CIITA</b>                     |                             |                    |                    |               |               |                |                                  | 16                    |                   |                   |               |          |                         |

[illegible]

|          |   |  |    |  |   |  |          |    |    |  |   |   |  |
|----------|---|--|----|--|---|--|----------|----|----|--|---|---|--|
| BIRC3    | 3 |  |    |  |   |  |          |    |    |  |   |   |  |
| WNT      |   |  |    |  |   |  |          |    |    |  |   |   |  |
| APC      |   |  |    |  |   |  |          | 11 |    |  |   |   |  |
| Others   |   |  |    |  |   |  |          |    |    |  |   |   |  |
| PI3K3CD  |   |  |    |  |   |  | 3/9/23/0 |    |    |  |   |   |  |
| KLHL6    |   |  | 14 |  |   |  |          |    |    |  |   |   |  |
| CXCR5    |   |  |    |  |   |  |          |    |    |  | 9 | 9 |  |
| CCR5     |   |  |    |  |   |  |          |    |    |  |   | 6 |  |
| CXCR3    |   |  |    |  |   |  |          |    |    |  | 7 |   |  |
| CCR6     |   |  |    |  |   |  | 1/5/8/6  |    |    |  | 4 |   |  |
| GPR34    |   |  |    |  |   |  | 1/19/0/0 |    |    |  |   |   |  |
| CAD      |   |  |    |  |   |  |          | 11 |    |  |   |   |  |
| ECT2L    |   |  |    |  |   |  |          | 11 |    |  |   |   |  |
| IGLL5    |   |  |    |  |   |  |          |    |    |  | 9 |   |  |
| PTPN14   |   |  |    |  |   |  |          |    |    |  | 6 |   |  |
| COL12A1  | 7 |  |    |  |   |  |          |    |    |  |   |   |  |
| COAL1A2  | 6 |  |    |  |   |  |          |    |    |  |   |   |  |
| DOCK8    | 6 |  |    |  |   |  |          |    |    |  |   |   |  |
| ADAMTS13 | 6 |  |    |  |   |  |          |    |    |  |   |   |  |
| KRT6B    | 6 |  |    |  |   |  |          |    |    |  |   |   |  |
| CELSR1   | 5 |  |    |  |   |  |          |    |    |  |   |   |  |
| RYR1     | 5 |  |    |  |   |  |          |    |    |  |   |   |  |
| LPRB1    |   |  |    |  | 6 |  |          |    | 15 |  |   |   |  |
| BRD4     |   |  |    |  | 6 |  |          |    |    |  |   |   |  |

OAMZL: ocular adnexa marginal zone lymphoma; SGMZL: salivary gland marginal zone lymphoma; HP: *Helicobacter pylori*; \* 11% both genes.
